# Supplementary material for: LINC01272/miR-876/ITGB2 axis facilitates the metastasis of colorectal cancer via epithelial-mesenchymal transition
Source: PubMed Central journal article supplement (PMC8176243; doi:10.7150/jca.55666), 2021-05-05
Supplement: jcav12p3909s1.pdf [file jcav12p3909s1.pdf]

## Supplementary figure 1

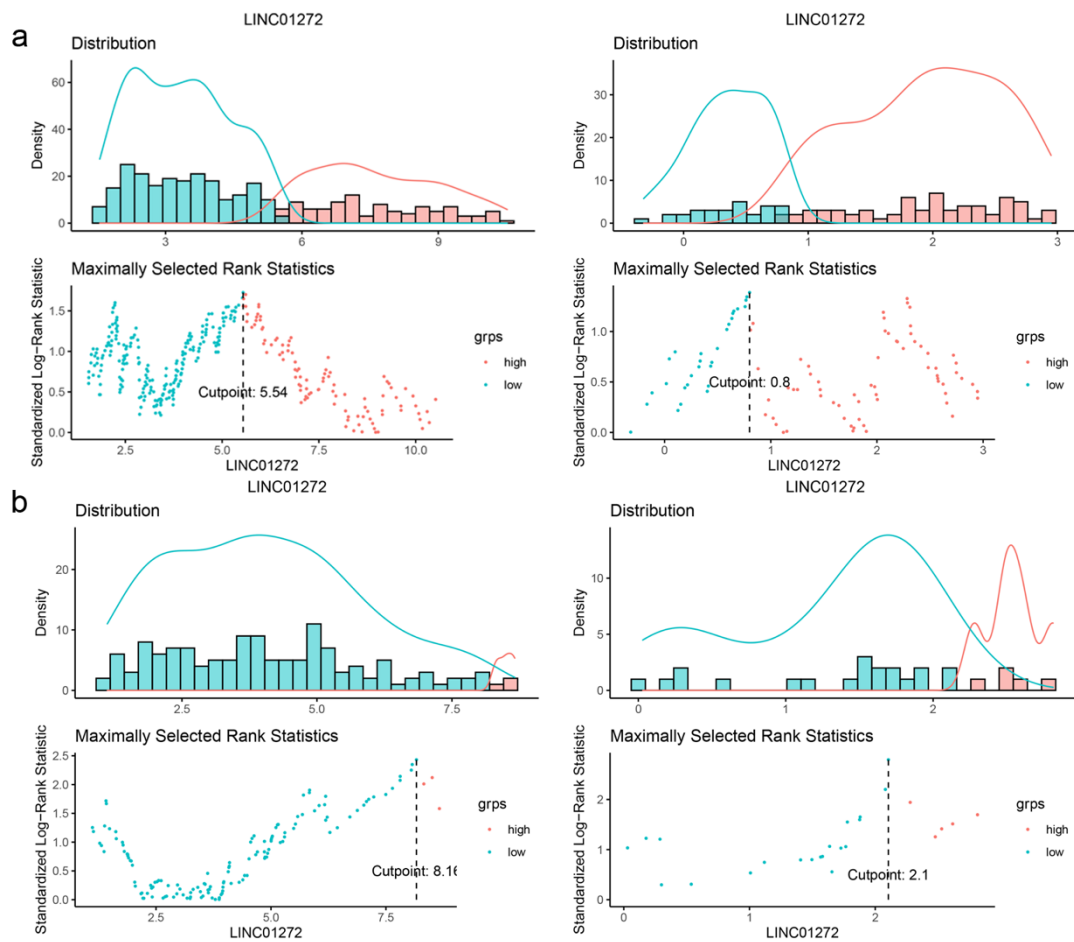

**Figure S1** Selection of the optimal cutoff value. a. The optimal cutoff value of LINC01272 expression when analyzing the prognosis (OS rate and DFS rate) of COAD patients. b. The optimal cutoff value of LINC01272 expression when analyzing the prognosis (OS rate and DFS rate) of READ patients.

Supplementary figure 2

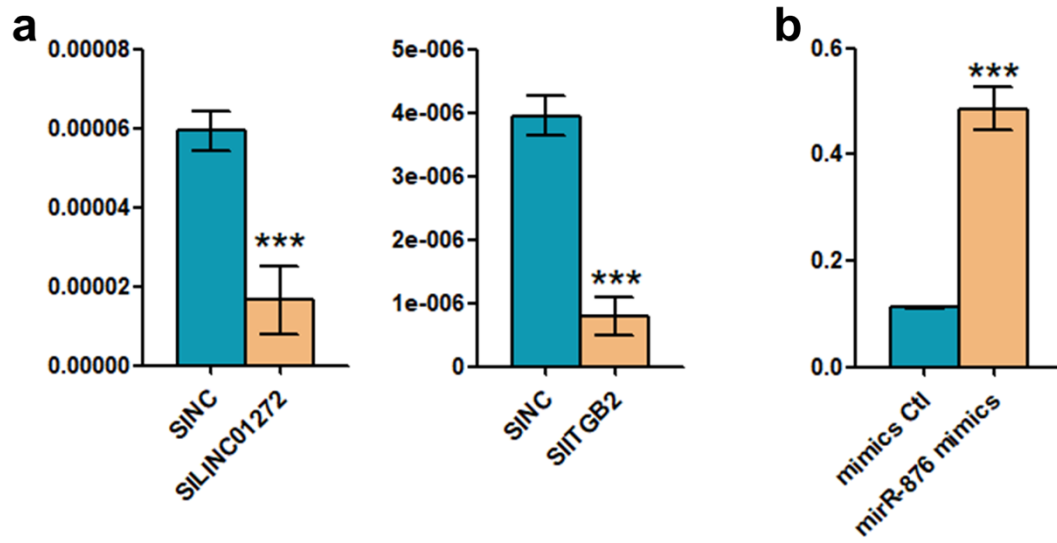

**Figure S2** Cell transfection efficiency. a. The knockdown efficiency of LINC01272 and ITGB2. b. The overexpression efficiency of miR-876.

### Supplementary figure 3

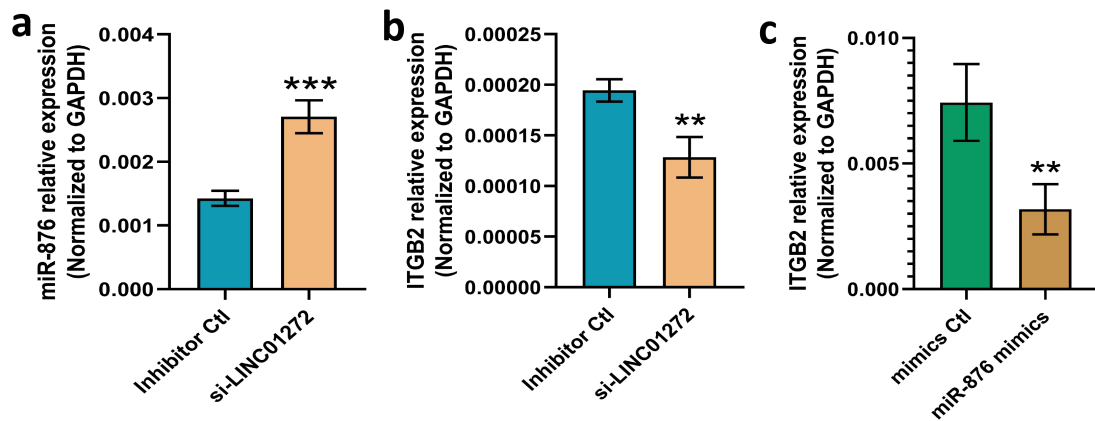

**Figure S3** Expression of related molecules after knockdown of LINC01272 or overexpression of miR-876. After knockdown of LINC01272, miR-876 expression was increased (A) and ITGB2 expression was decreased (B). And the relative expression of ITGB2 was reduced upon overexpression of miR-876 (C).

## Supplementary table

**Table S1** The forward and reverse primers for qRT-PCR

| Genes          | Forward (5'- to 3'-)    | Reverse (5'- to 3'-)    |
|----------------|-------------------------|-------------------------|
| LINC01272      | CCAGGACAAGTGCCAGTAAAC   | TGGTGGCAGTGGAGGCAGAA    |
| hsa-miR-876-5p | CCGCGCGTGGATTTCTTTGTGAA | AGTGCAGGGTCCGAGGTATT    |
| ITGB2          | AGTGCAGGGTCCGAGGTATT    | ACCAGAGCAGAGACCGCA      |
| Vimentin       | CAGTTTTTCCCAATGTAGCCA   | AAGCAGGAGTCCACTGAGTACC  |
| SLUG           | TTCTCTTCCATTTACGCATC    | TCTTTGGGGCGAGTGAGTCC    |
| TWIST          | AGCTTCAATGGCATGGGGGT    | CGGGAGTCCGCAGTCTTACG    |
| SNAIL          | GCTCAGCTTGTCCGAGGGCA    | GGAAGCCTAACTACAGCGAGC   |
| CDH1           | GATGAGCATTGGCAGCGA      | CTCTCGGTCCAGCCCAGTGGT   |
| CDH2           | TCGCCATCCAGACCGACCCA    | GCAGTTGACTGAGGCGGGTGC   |
| ZEB1           | GCAGAUACUACACCAACUCTT   | AUGGUGGUUAGUCAGUUGCTT   |
| ZEB2           | AACACCCCTGGCACAACAAC    | GCTGACTGCATGACCATCGC    |
| U6             | GCTTCGGCAGCACATATACT    | GTGCAGGGTCCGAGGTATTC    |
| GAPDH          | GGAGCGAGATCCCTCCAAAAT   | GGCTGTTGTCATACTTCTCATGG |
